# Supplementary material for: Crystal structure of steroid reductase SRD5A reveals conserved steroid reduction mechanism
Source: PubMed Central journal article supplement (PMC7815742; doi:10.1038/s41467-020-20675-2), 2021-01-19
Supplement: 41467_2020_20675_MOESM1_ESM.pdf [file 41467_2020_20675_MOESM1_ESM.pdf]

1                                          Supplementary Information for  
2                                          **Crystal structure of steroid reductase SRD5A reveals conserved**  
3                                          **steroid reduction mechanism**

4      Yufei Han<sup>1†</sup>, Qian Zhuang<sup>2†</sup>, Bo Sun<sup>3†</sup>, Wenping Lv<sup>4†</sup>, Sheng Wang<sup>5†</sup>, Qingjie Xiao<sup>6</sup>, Bin Pang<sup>1</sup>,  
5      Youli Zhou<sup>1</sup>, Fuxing Wang<sup>1</sup>, Pengliang Chi<sup>6</sup>, Qisheng Wang<sup>3</sup>, Zhen Li<sup>7</sup>, Lizhe Zhu<sup>4</sup>, Fuping Li<sup>8</sup>,  
6      Dong Deng<sup>6\*</sup>, Ying-Chih Chiang<sup>1\*</sup>, Zhenfei Li<sup>2\*</sup>, Ruobing Ren<sup>1\*</sup>

7  
8      <sup>1</sup> Kobilka Institute of Innovative Drug Discovery, School of Life and Health Sciences, The Chinese  
9      University of Hong Kong, Shenzhen, Guangdong 518172, China

10     <sup>2</sup> State Key Laboratory of Cell Biology, Shanghai Institute of Biochemistry and Cell Biology, Center  
11     for Excellence in Molecular Cell Science, Chinese Academy of Sciences; University of Chinese  
12     Academy of Sciences, 320 Yueyang Road, Shanghai 200031, China

13     <sup>3</sup> Shanghai Synchrotron Radiation Facility, Shanghai Advanced Research Institute, Chinese  
14     Academy of Sciences, Shanghai 201204, China

15     <sup>4</sup> Warshel Institute for Computational Biology, School of Life and Health Sciences, The Chinese  
16     University of Hong Kong, Shenzhen, Guangdong 518172, China

17     <sup>5</sup> Tencent AI lab, Shenzhen, Guangdong 518000, China

18     <sup>6</sup> Department of Obstetrics, Key Laboratory of Birth Defects and Related Disease of Women and  
19     Children of MOE, State Key Laboratory of Biotherapy, West China Second Hospital, Sichuan  
20     University, Chengdu 610041, China

21     <sup>7</sup> School of Science and Engineering, The Chinese University of Hong Kong, Shenzhen, Guangdong  
22     518172, China

23     <sup>8</sup> Human Sperm Bank, Key Laboratory of Birth Defects and Related Disease of Women and  
24     Children of MOE, West China Second Hospital, Sichuan University, Chengdu 610041, China

25  
26     \* To whom correspondence should be addressed. Email: [renruobing@cuhk.edu.cn](mailto:renruobing@cuhk.edu.cn),  
27     [zhenfei.li@sibcb.ac.cn](mailto:zhenfei.li@sibcb.ac.cn), [chiangyc@cuhk.edu.cn](mailto:chiangyc@cuhk.edu.cn), and [dengd@scu.edu.cn](mailto:dengd@scu.edu.cn)

28     † These authors contribute equally

- 1 This PDF File contains:
- 2 Supplementary Figures 1-10
- 3 Supplementary Tables 1-4
- 4

# 1 Supplementary Figures 1-9

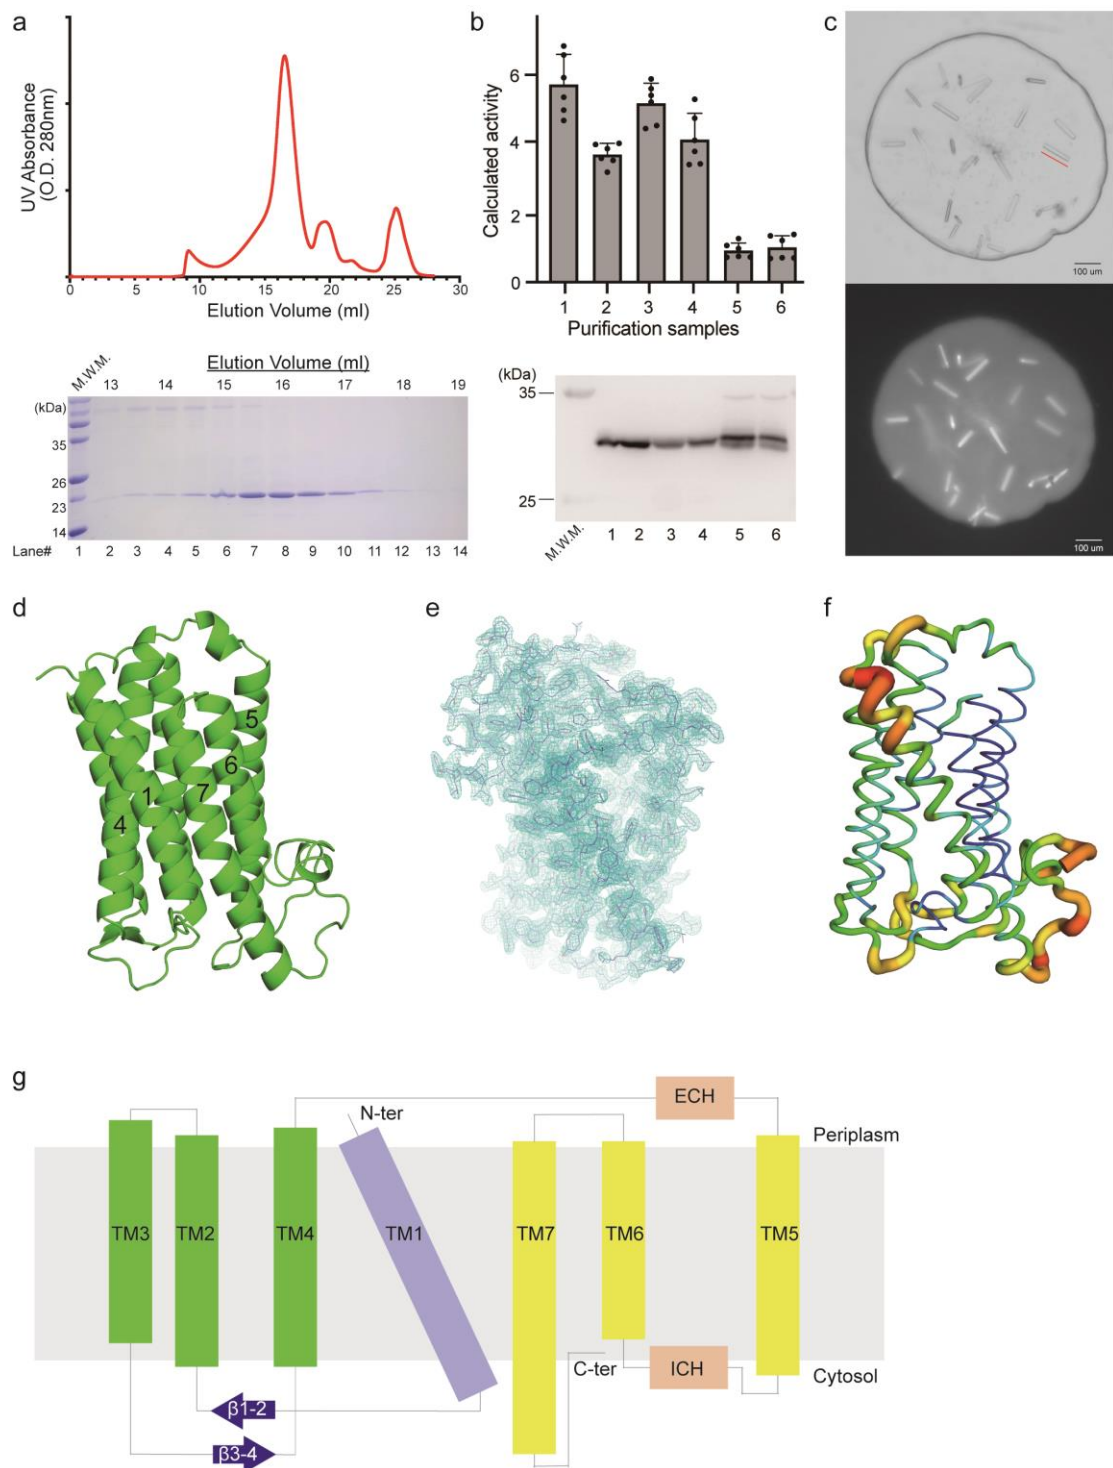

2  
3 **Supplementary Fig. 1 | Purification, crystallization and structural determination**  
4 **of PbSRD5A. a**, The representative size exclusion chromatography of PbSRD5A and  
5 SDS-PAGE gel stained by Coomassie Brilliant Blue R-250. **b**, The enzyme activity of  
6 PbSRD5A during purification. The samples include: (1) whole cell crude extract; (2)

1 re-suspended cell membrane after 1st round of ultracentrifugation; (3) solubilized  
2 solution in 1% DDM; (4) supernatant after 2nd round of ultracentrifugation, (5) protein  
3 eluted from Ni-column, and (6) purified protein after size-exclusion chromatography.  
4 HPLC was used to detect the 5 $\alpha$ -DHP% converted from progesterone, using the same  
5 units of protein. Equally protein was quantified by calculating the grey level of western  
6 blot. The activities were calculated as: *Calculated activity = detected activity / (Sample*  
7 *volumes in an assay system × grey value / Volume loaded on western blot)*, and  
8 normalized by sample (6). Data are mean $\pm$ s.d. derived from technically independent  
9 experiments in duplicate. Each experiment was reproduced three times on separate  
10 occasions with similar results. **c**, Photograph of PbSRD5A crystals in lipidic cubic  
11 phase under visible (upper) and UV light (lower). **d**, The initial searching model of  
12 PbSRD5A for molecular replacement is shown as green cartoon. **e**, The 2F<sub>o</sub>-F<sub>c</sub> electron  
13 density map of PbSRD5A (cyan mesh) is contoured at 1.2 $\sigma$ . **f**, The b factor of PbSRD5A  
14 is colored by rainbow. Red and blue represent the highest and lowest b factor values,  
15 respectively. **g**, Topology of PbSRD5A. The seven transmembrane segments are  
16 divided into TM1 (lightblue), TM2-4 (green), and TM5-7 (yellow). The extracellular  
17 and intracellular short alpha helices (ECH and ICH) are colored wheat. The short anti-  
18 parallel beta strands are colored blue.

19

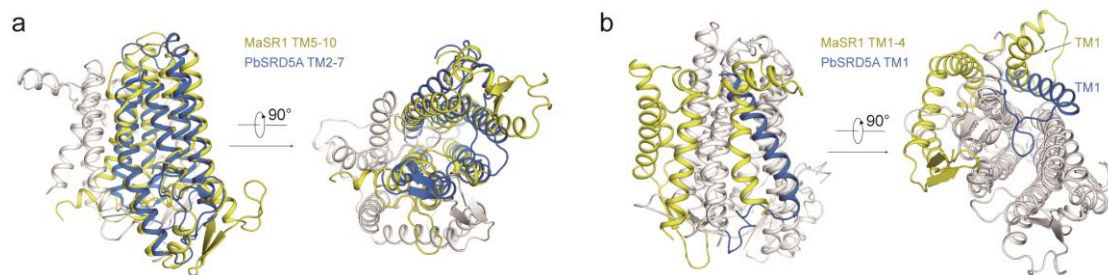

1

2 **Supplementary Fig. 2 | Structural alignment of PbSRD5A and MaSR1.** **a**, The  
 3 superposition of TM2-7 of PbSRD5A and TM5-10 of MaSR1 is generated using cealign  
 4 in pymol. TM2-7 of PbSRD5A and TM5-10 of MaSR1 (PDB code: 4QUV) are colored  
 5 marine and yellow, respectively. TM1 of PbSRD5A and TM1-4 of MaSR1 are colored  
 6 white. Two perpendicular views are shown. TM2-7 of PbSRD5A and TM5-10 of  
 7 MaSR1 are superimposed with the r.m.s.d. of 3.60 Å over C $\alpha$  of 184 residues. **b**, TM1  
 8 of PbSRD5A and TM1-4 of MaSR1 are colored marine and yellow, respectively. TM2-  
 9 7 of PbSRD5A and TM5-10 of MaSR1 are colored white. Two TM1s adopt distinct  
 10 conformations and TM2-4 of MaSR1 is missing in PbSRD5A.

11

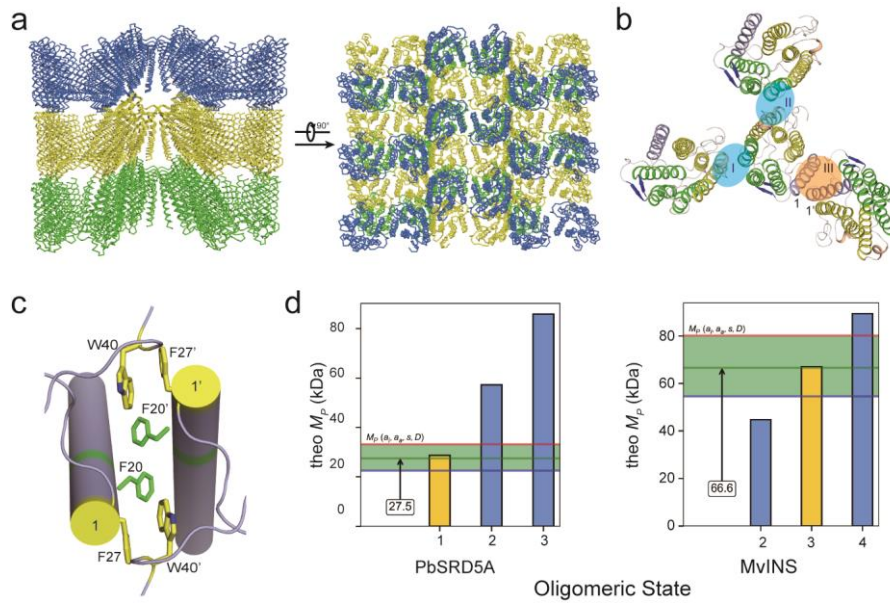

1

2 **Supplementary Fig. 3 | Crystal packing and oligomerization state examination of**

3 **PbSRD5A. a**, Two perpendicular views of the crystal packing of PbSRD5A in the space

4 group of C222<sub>1</sub>. **b**, One PbSRD5A molecule interacts with three adjacent molecules in

5 the crystal. The interface I and II are highlighted in cyan shadow and interface III is in

6 orange. **c**, The hydrophobic residues involved in interface III are shown as yellow and

7 green sticks. **d**, The estimated molecular weights were calculated by AUC analysis.

8 Ranges of PbSRD5A and MvINS are shown in palegreen. X-axis values are the putative

9 oligomerization states.

10

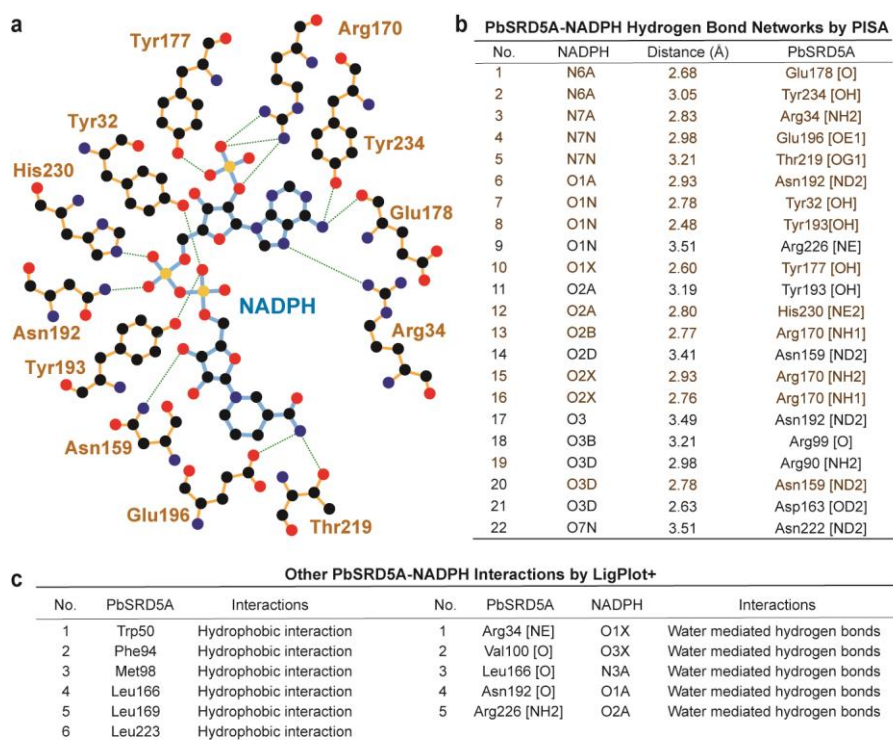

1

2 **Supplementary Fig. 4 | a**, Residues that directly form hydrogen bonds with NADPH

3 are shown in stick-ball model. The bonds of residues and NADPH are colored in yellow

4 and cyan, respectively. The atoms are colored by elements (black for carbon, red for

5 oxygen, purple for nitrogen, and yellow for phosphorus). The diagram is generated by

6 LigPlot+<sup>1</sup>. **b**, The hydrogen bond distances between atoms in PbSRD5A residues and

7 NADPH are measured by PISA<sup>2</sup>. The residues shown in panel **a** are colored in brown.

8 Other hydrogen bonds only found by PISA are colored in black. **c**, The indirect

9 interactions between PbSRD5A and NADPH were listed as two categories. The

10 hydrophobic interactions and water mediated polar interactions are listed in the left and

11 right panels, respectively. These interactions are analyzed by LigPlot+<sup>1</sup>.

12

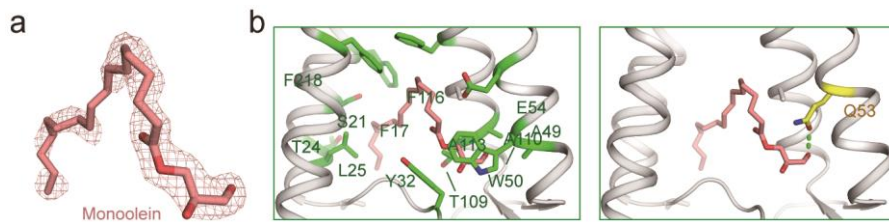

1

2 **Supplementary Fig. 5 | PbSRD5A accommodates one MAG molecule in crystal**

3 **structure. a,** Monoolein fits into the density map shown in Fig. **2b. b,** Coordination of

4 monoolein in PbSRD5A. The residues that interact with monoolein with hydrophobic

5 effect, such as F17, S21 T24, L25, Y32, A49, W50, T109, A110, A113 and F116, are

6 shown as green sticks. Q53, shown as yellow sticks, forms hydrogen bond (green dash)

7 with the hydroxyl group of monoolein.

8



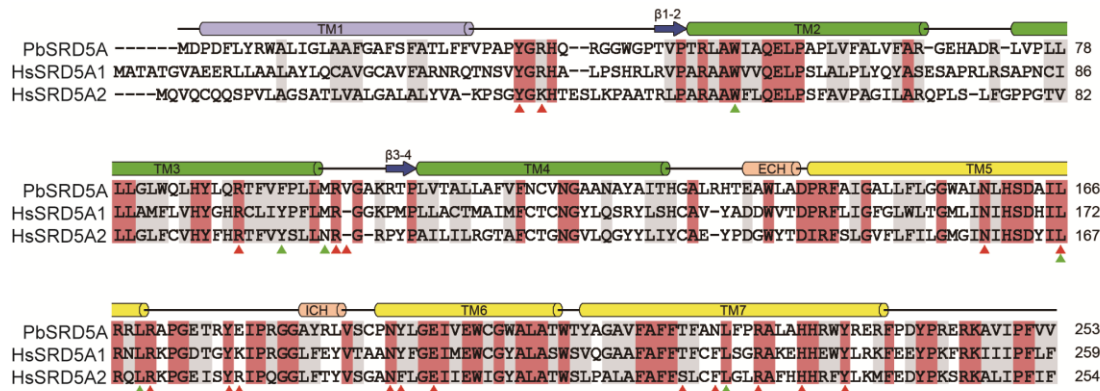

1

2 **Supplementary Fig. 6 | Sequence alignment of PbSRD5A with HsSRD5A1 and -2.**

3 Secondary structural elements of PbSRD5A are indicated above the sequence alignment.

4 Invariant and highly conserved amino acids are shaded in rose red and grey, respectively.

5 The residues identified for NADPH binding are highlighted at the bottom by red (polar

6 interactions) and green triangles (hydrophobic effects), respectively.

7

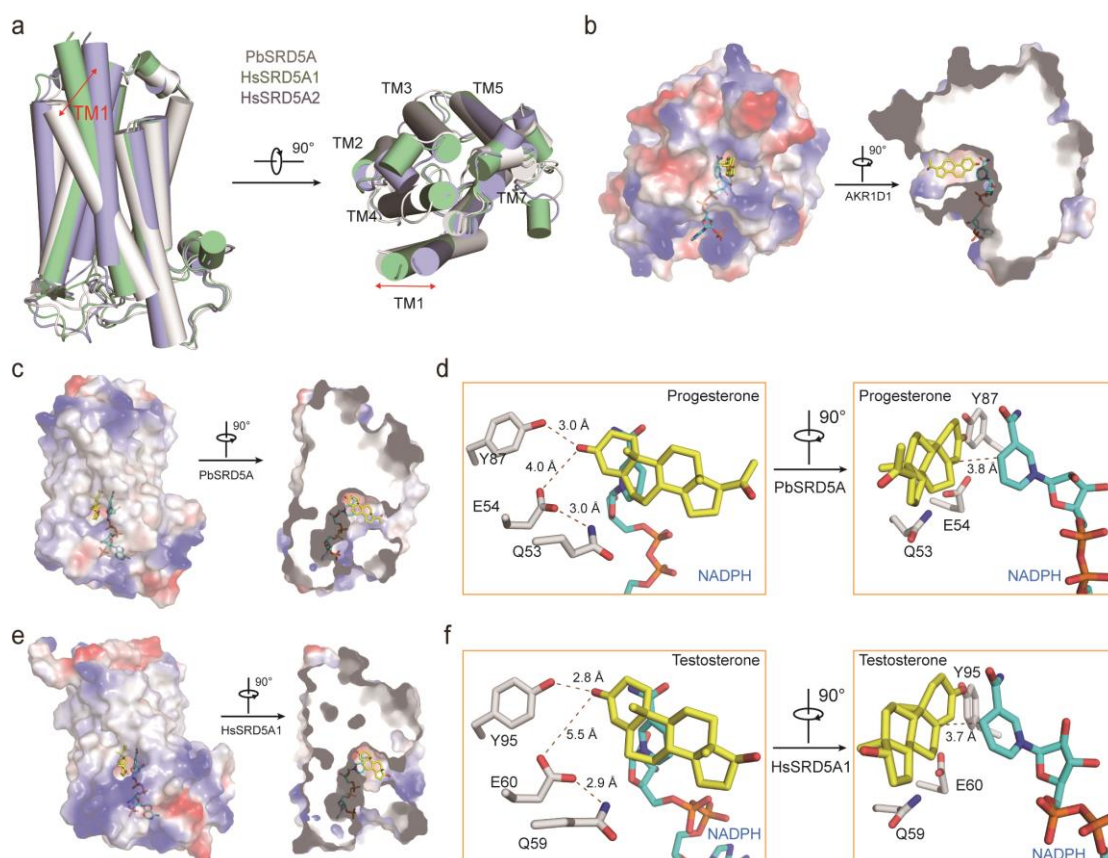

1

2 **Supplementary Fig. 7 | Structural comparison and substrate docking of SRD5As.**

3 **a**, The superposition of PbSRD5A (gray), HsSRD5A1 (palegreen) and HsSRD5A2  
 4 (lightblue) is shown as cylindrical cartoon. The arrows indicate the conformational  
 5 difference of TM1s in SRD5As by two perpendicular views. **b**, The structure of  
 6 AKR1D1-progesterone (PDB code: 3COT). The semi-transparent electrostatic surface  
 7 of HsSRD5A2 is shown. **c**, The docking pose of progesterone in PbSRD5A docking  
 8 model. **d**, The coordination of conserved Q-E-Y motif with progesterone in PbSRD5A  
 9 docking model. **e**, The docking pose of progesterone in HsSRD5A1 docking model. **f**,  
 10 The coordination of conserved Q-E-Y motif in HsSRD5A1 docking model. In **(b)-(f)**,  
 11 substrates are shown as yellow stick. NADPH is colored cyan. Two perpendicular views  
 12 are shown.

13

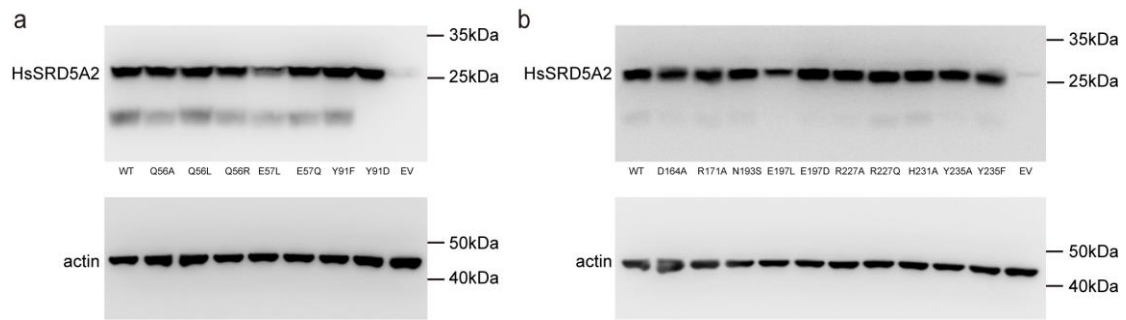

1

2 **Supplementary Fig. 8 | The expression level of HsSRD5A2 mutants in HEK293**

3 **cells. a,** The western blot for WT, Q56A, Q56L, Q56R, E57L, E57Q, Y91F, Y91D and

4 EV in Fig. 3f. **b,** The western blot for WT, D164A, R171A, N193S, E197L, E197D,

5 R227A, R227Q, H231A, Y235A, Y235F and EV in Fig. 4b.

6

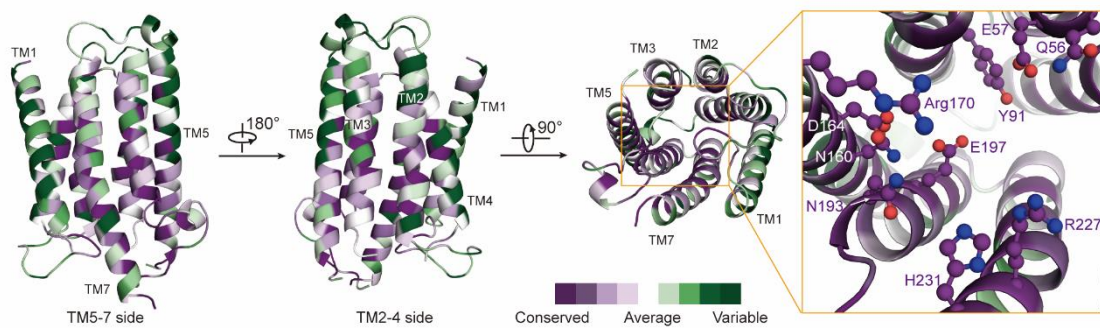

**Supplementary Fig. 9 | Mapping of the conserved residues of steroid 5-alpha reductases to the structural model of HsSRD5A2.** Sequence alignment was made for 150 steroid 5-alpha reductases and putative homologues. The conserved residues were mapped to the structural model of HsSRD5A2 using ConSurf<sup>3,4</sup>. Invariant residues in NADPH binding and catalytic site residues are show in stick-ball model in the inset.

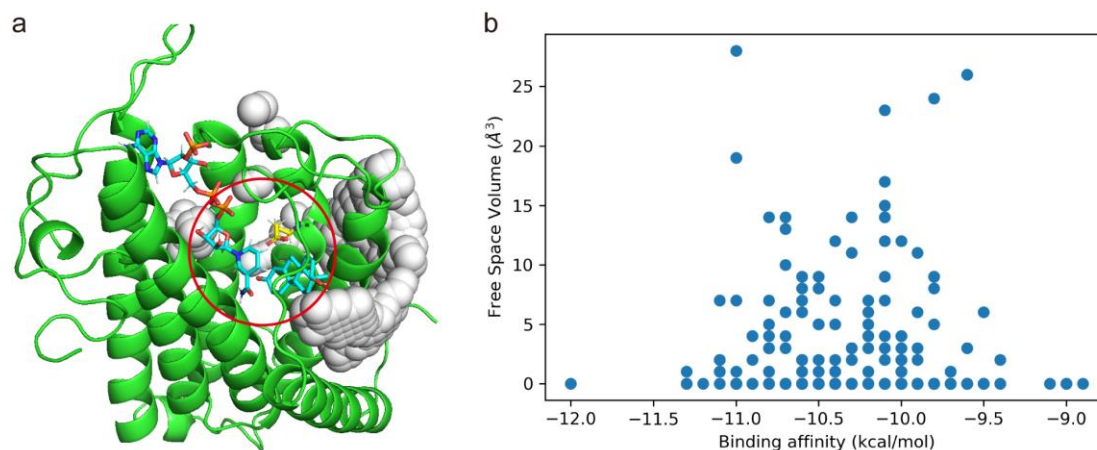

1  
 2 **Supplementary Fig. 10 | The extra space in substrate binding pocket of HsSRD5A2**  
 3 **is limited to accommodate water molecule in the presence of substrate. a,** An  
 4 oxygen atom is used as a probe to search the volume of free space around E57 (radius  
 5 of 15Å to the carbon atom of the carboxyl group of E57) at the optimal binding pose.  
 6 The free space is shown in white spheres. Testosterone (cyan), NADPH (cyan), and E57  
 7 (yellow) are shown in stick mode. HsSRD5A2 is shown in cartoon mode. **b,** A  
 8 correlation analysis of the free space volume around E57 after testosterone is docked  
 9 and the predicted binding affinity of testosterone.  
 10

1 **Supplementary Tables 1-4**

| Samples                                                                                      | (1)                   | (2)                   | (3)                   | (4)                                     | (5)                                     | (6)                                     |
|----------------------------------------------------------------------------------------------|-----------------------|-----------------------|-----------------------|-----------------------------------------|-----------------------------------------|-----------------------------------------|
| Purification volume<br>(mL)                                                                  | 50                    | 40                    | 55                    | 50                                      | 16                                      | 2.5                                     |
| Assay volumes<br>( $\mu$ L)                                                                  | 0.30                  | 0.24                  | 0.33                  | 0.30                                    | 0.96                                    | 0.15                                    |
| Total protein<br>(mg)                                                                        | -                     | -                     | -                     | 857.50                                  | 1.60                                    | 0.15                                    |
| Total activity<br>( $\mu$ mol $\cdot$ min <sup>-1</sup> )                                    | $6.85 \times 10^{-6}$ | $5.34 \times 10^{-6}$ | $5.93 \times 10^{-6}$ | $4.82 \times 10^{-6}$                   | $8.75 \times 10^{-7}$                   | $5.27 \times 10^{-7}$                   |
| <b>Specific activity</b><br>( $\mu$ mol $\cdot$ mg <sup>-1</sup> $\cdot$ min <sup>-1</sup> ) | -                     | -                     | -                     | <b><math>5.67 \times 10^{-9}</math></b> | <b><math>5.47 \times 10^{-7}</math></b> | <b><math>3.51 \times 10^{-6}</math></b> |
| Volume on western<br>blot ( $\mu$ L)                                                         | 4.50                  | 3.60                  | 4.95                  | 4.50                                    | 3.60                                    | 1.13                                    |
| Grey value                                                                                   | 1.06                  | 1.38                  | 1.07                  | 1.09                                    | 1.25                                    | 1.00                                    |
| Detected activity*<br>(normalized)                                                           | 3.02                  | 2.54                  | 2.77                  | 2.24                                    | 2.28                                    | 1.00                                    |
| <b>Calculated activity#</b><br>(normalized)                                                  | <b>5.70</b>           | <b>3.68</b>           | <b>5.18</b>           | <b>4.11</b>                             | <b>0.91</b>                             | <b>1.00</b>                             |

2

3 **Supplementary Table 1 | Purification and enzyme activity examination table.** The

4 enzyme activity of PbSRD5A during purification. The samples include: (1) whole cell

5 crude extract; (2) re-suspended cell membrane after 1<sup>st</sup> round of ultracentrifugation; (3)

6 solubilized solution in 1% DDM; (4) supernatant after 2<sup>nd</sup> round of ultracentrifugation,

7 (5) protein eluted from Ni-column, and (6) purified protein after size-exclusion

8 chromatography. HPLC was used to detect the 5a-DHP% converted from progesterone,

9 using the same units of protein. Equally protein was quantified by calculating the grey

10 level of western blot. The activities were calculated as: *Total activity = Total product /*

11 *Reaction time, Specific activity = Total product / (Total protein  $\times$  Reaction time);*

12 *Calculated activity = Detected activity / (Sample volumes in an assay system  $\times$  grey*

13 *value / Volume loaded on western blot), and normalized by sample #6.*

14

| <b>PbSRD5A</b>                                       |                          |
|------------------------------------------------------|--------------------------|
| <b>Data collection</b>                               |                          |
| Space group                                          | C222 <sub>1</sub>        |
| Cell dimensions                                      |                          |
| <i>a</i> , <i>b</i> , <i>c</i> (Å)                   | 52.19 104.26 123.05      |
| α, β, γ (°)                                          | 90 90 90                 |
| Resolution (Å)                                       | 19.36-2.00 (2.05-2.00) * |
| <i>R</i> <sub>sym</sub> or <i>R</i> <sub>merge</sub> | 0.098 (0.84)             |
| <i>I</i> / σ <i>I</i>                                | 12.80 (2.30)             |
| Completeness (%)                                     | 99.60 (99.30)            |
| Redundancy                                           | 6.60 (6.70)              |
| <b>Refinement</b>                                    |                          |
| Resolution (Å)                                       | 19.36-2.00               |
| No. reflections                                      | 22971                    |
| <i>R</i> <sub>work</sub> / <i>R</i> <sub>free</sub>  | 19.50/23.27              |
| No. atoms                                            |                          |
| Protein                                              | 2008                     |
| Ligand/ion                                           | 200                      |
| Water                                                | 90                       |
| <i>B</i> -factors                                    |                          |
| Protein                                              | 34.44                    |
| Ligand/ion                                           | 49.18                    |
| Water                                                | 41.2                     |
| R.m.s. deviations                                    |                          |
| Bond lengths (Å)                                     | 0.01                     |
| Bond angles (°)                                      | 1.45                     |

1 \*Values in parentheses are for highest-resolution shell.

2

3 **Supplementary Table 2 | Statistics of data collection and refinement for native**

4 **PbSRD5A.** One crystal was used for structure determination. Values in parentheses are

5 for the highest resolution shell.  $R_{merge} = \frac{\sum_h \sum_i |I_{h,i} - \bar{I}_h|}{\sum_h \sum_i I_{h,i}}$ , where  $\bar{I}_h$  is the mean

6 intensity of the *i* observations of symmetry related reflections of *h*.  $R = \frac{\sum |F_{obs} - F_{calc}|}{\sum F_{obs}}$ ,

7 where *F*<sub>calc</sub> is the calculated protein structure factor from the atomic

8 model (*R*<sub>free</sub> was calculated with 8.71% of the reflections selected). *a* is reflections

9 used for *R* and *R*<sub>free</sub> at low resolution bin. *b* is reflections used for *R* and *R*<sub>free</sub> at high

10 resolution bin.

11

| Category                                            | HsSRD5A2 | HsSRD5A1 | PbSRD5A |
|-----------------------------------------------------|----------|----------|---------|
| NADPH binding<br>residue mutations                  | N160D    | N165     | N159    |
|                                                     | D164V    | D169     | D163    |
|                                                     | R171S    | R176     | R170    |
|                                                     | N193S    | N198     | N192    |
|                                                     | E197D    | E202     | E196    |
|                                                     | R227Q    | R232     | R226    |
|                                                     | H231R    | H236     | H230    |
| Catalytic site mutations                            | Y235F    | Y240     | Y234    |
|                                                     | Q56R     | Q59      | Q53     |
|                                                     | E57Q     | E60      | E54     |
| Structural destabilizing<br>mutations               | Y91D     | Y95      | Y87     |
|                                                     | A207D    | A212     | A206    |
|                                                     | S210F    | S215     | T209    |
|                                                     | P212R    | Q217     | A211    |
|                                                     | Q126R    | Q131     | N124    |
|                                                     | E200K    | E205     | E199    |
|                                                     | P181L    | P186     | P180    |
|                                                     | G183S    | G188     | G182    |
| Helix breaking mutations                            | S245Y    | F250     | E244    |
|                                                     | R246Q/W  | R251     | R245    |
|                                                     | L20P     | V23      | S21     |
|                                                     | L55Q/P   | V58      | A52     |
|                                                     | H162P    | H167     | H161    |
| Small to bulky residue<br>(Destabilizing mutations) | L224P    | L229     | L223    |
|                                                     | H230P    | E235     | H230    |
|                                                     | G34R/W   | G40      | G33     |
|                                                     | P59R     | P62      | P56     |
|                                                     | G85D     | A89      | G81     |
|                                                     | G115D    | A120     | A113    |
|                                                     | G123R    | G128     | G121    |
|                                                     | G158R    | L163     | A157    |
|                                                     | G196S    | G201     | G195    |
|                                                     | G203S    | G208     | G202    |

1 **Supplementary Table 3 | Disease related loss-of-function mutations in HsSRD5A2.**

2 Disease related loss-of-function mutations in HsSRD5A2 and the corresponding  
3 residues in HsSRD5A1 and PbSRD5A are listed. The invariant residues and highly  
4 conserved residues between HsSRD5A2 and PbSRD5A are colored in red and purple,  
5 respectively.



| Name              | Forward primer (5'-3')                               | Reverse primer (5'-3')                                |
|-------------------|------------------------------------------------------|-------------------------------------------------------|
| PbSRD5A WT insert | GATGCTGGCAGCGGCCATA<br>TGGACCCGGATTTCTGTGTA<br>TCGTT | ACCGCATGCCTCGACCTCG<br>AGCTAAACCACAAACGGAA<br>TAACCGC |
| PbSRD5A N159A     | TGGCTGGGCGCTGGCACTG<br>CA                            | TGCAGTGCCAGCGCCAGC<br>CA                              |
| PbSRD5A D163V     | CACAGCGTTGCGATCCTGC<br>GT                            | AGGATCGCAACGCTGTGCA<br>GGT                            |
| PbSRD5A R170S     | TCGTCTGAGCGCGCCGGG<br>TGAAA                          | TTTACCCGGCGCGCTCAG<br>ACGA                            |
| PbSRD5A N192A     | TTAGCTGCCCGGCATAACC<br>TG                            | CAGGTATGCCGGGCAGCT<br>AA                              |
| PbSRD5A E196L     | TGGGCCTGATCGTTGAGT<br>GGT                            | ACCACTCAACGATCAGGC<br>CCA                             |
| PbSRD5A R226Q     | CTGTTTCCGCAAGCGCTG<br>GCG                            | CGCCAGCGCTTGCGGAAA<br>CAG                             |
| HsSRD5A2 WT       | GACGATAAGCTTATGCAG<br>GTTC                           | TCATCTTTTAAGAATTCTG<br>CAG                            |
| HsSRD5A2 Q56A     | CCGCGCCGCTGGTTCCT<br>GGCAGAGCTGCCTTCCTT<br>CGCGG     | CCGCGAAGGAAGGCAGCT<br>CTGCCAGGAACCAGGCGG<br>CGCGG     |
| HsSRD5A2 Q56L     | CCGCGCCGCTGGTTCCT<br>GCTGGAGCTGCCTTCCTT<br>CGCGG     | CCGCGAAGGAAGGCAGCT<br>CCAGCAGGAACCAGGCGG<br>CGCGG     |
| HsSRD5A2 Q56R     | CCGCGCCGCTGGTTCCT<br>GCGAGAGCTGCCTTCCTT<br>CGCGG     | CCGCGAAGGAAGGCAGCT<br>CTCGCAGGAACCAGGCGG<br>CGCGG     |
| HsSRD5A2 E57L     | CGCCGCCTGGTTCCTGCA<br>GTTACTGCCTTCCTTCGC<br>GGTGC    | GCACCGCGAAGGAAGGCA<br>GTAAGTGCAGGAACCAGG<br>CGGCG     |
| HsSRD5A2 E57Q     | CGCCGCCTGGTTCCTGCA<br>GCAGCTGCCTTCCTTCGC<br>GGTGC    | GCACCGCGAAGGAAGGCA<br>GCTGCTGCAGGAACCAGG<br>CGGCG     |
| HsSRD5A2 Y91F     | GGGCCTCTTCTGCGTACA<br>TTTCTTCCACAGGACATT<br>TGTGT    | ACACAAATGTCCTGTGGA<br>AGAAATGTACGCAGAAGA<br>GGCCC     |
| HsSRD5A2 Y91D     | GGGCCTCTTCTGCGTACA<br>TGAATTCCACAGGACATT<br>TGTGT    | ACACAAATGTCCTGTGGA<br>AGTCATGTACGCAGAAGA<br>GGCCC     |
| HsSRD5A2 D164A    | GGGAATAAACATTCATAG<br>TGCTATATATTGCGCCA<br>GCTCA     | TGAGCTGGCGCAATATAT<br>AGGCACTATGAATGTTTAT<br>TCCC     |
| HsSRD5A2 R171A    | CTATATATTGCGCCAGCT<br>CGCAAAGCCTGGAGAAA<br>TCAGCT    | AGCTGATTTCTCCAGGCTT<br>TGCGAGCTGGCGCAATAT<br>ATAG     |

|                |                                                   |                                                   |
|----------------|---------------------------------------------------|---------------------------------------------------|
| HsSRD5A2 N193S | TACGTATGTTTCTGGAGC<br>CAGTTTCCTCGGTGAGAT<br>CATTG | CAATGATCTCACCGAGGA<br>AACTGGCTCCAGAAACAT<br>ACGTA |
| HsSRD5A2 E197L | TGGAGCCAATTCCTCGG<br>TTAATCATTGAATGGAT<br>CGGCT   | AGCCGATCCATTCAATGA<br>TTAAACCGAGGAAATTGG<br>CTCCA |
| HsSRD5A2 E197D | TGGAGCCAATTCCTCGG<br>TGACATCATTGAATGGAT<br>CGGCT  | AGCCGATCCATTCAATGA<br>TGTCACCGAGGAAATTGG<br>CTCCA |
| HsSRD5A2 R227Q | ACTTTGTTTCCTTGGGCTG<br>GCTGCTTTTCACCACCAT<br>AGGT | ACCTATGGTGGTGAAAAG<br>CTTGCAGCCCAAGGAAAC<br>AAAGT |
| HsSRD5A2 H231A | TGGGCTGCGAGCTTTTCA<br>CGCTCATAGGTTCTACCT<br>CAAGA | TCTTGAGGTAGAACCTAT<br>GAGCGTGAAAAGCTCGCA<br>GCCCA |
| HsSRD5A2 Y235A | TTTTCACCACCATAGGTT<br>CGCACTCAAGATGTTTGA<br>GGACT | AGTCCTCAAACATCTTGA<br>GTGCGAACCTATGGTGGT<br>GAAAA |
| HsSRD5A2 Y235F | TTTTCACCACCATAGGTT<br>CTTCCTCAAGATGTTTGA<br>GGACT | AGTCCTCAAACATCTTGA<br>GGAAGAACCTATGGTGGT<br>GAAAA |

1 **Supplementary Table 4 | List of primer sequences used in cloning and enzymatic**  
2 **assay.**

3

1 **Supplementary references:**

- 2 1 Wallace, A. C., Laskowski, R. A. & Thornton, J. M. LIGPLOT: a program to generate  
3 schematic diagrams of protein-ligand interactions. *Protein engineering* **8**, 127-134,  
4 doi:10.1093/protein/8.2.127 (1995).
- 5 2 Krissinel, E. & Henrick, K. Inference of macromolecular assemblies from crystalline state.  
6 *Journal of molecular biology* **372**, 774-797, doi:10.1016/j.jmb.2007.05.022 (2007).
- 7 3 Ashkenazy, H. *et al.* ConSurf 2016: an improved methodology to estimate and visualize  
8 evolutionary conservation in macromolecules. *Nucleic acids research* **44**, W344-350,  
9 doi:10.1093/nar/gkw408 (2016).
- 10 4 Landau, M. *et al.* ConSurf 2005: the projection of evolutionary conservation scores of  
11 residues on protein structures. *Nucleic acids research* **33**, W299-302,  
12 doi:10.1093/nar/gki370 (2005).
- 13
